# Supplementary material for: Single-particle electroluminescence of CsPbBr3 perovskite nanocrystals reveals particle-selective recombination and blinking as key efficiency factors
Source: PubMed Central journal article supplement (PMC6776502; doi:10.1038/s41467-019-12512-y), 2019-10-03
Supplement: 41467_2019_12512_MOESM1_ESM.pdf [file 41467_2019_12512_MOESM1_ESM.pdf]

## Supplementary Information

### **Single-particle electroluminescence of CsPbBr<sub>3</sub> perovskite nanocrystals reveals particle-selective recombination and blinking as key efficiency factors**

Dharmendar Kumar Sharma<sup>1,2</sup>, Shuzo Hirata<sup>3</sup>, Martin Vacha<sup>1</sup>

<sup>1</sup>Department of Materials Science and Engineering, Tokyo Institute of Technology, Ookayama 2-12-1-S8-44, Meguro-ku, Tokyo 152-8552, Japan

<sup>2</sup>Department of Chemistry, Maulana Azad National Institute of Technology, Bhopal 462-003, India

<sup>3</sup>Department of Engineering Science and Engineering, The University of Electro Communications, 1-5-1 Chofugaoka, Chofu, Tokyo 182-8585, Japan

Correspondence and requests for materials should be addressed to D.S.K ([dksiitb@gmail.com](mailto:dksiitb@gmail.com)) and M.V. ([vacha.m.aa@m.titech.ac.jp](mailto:vacha.m.aa@m.titech.ac.jp))

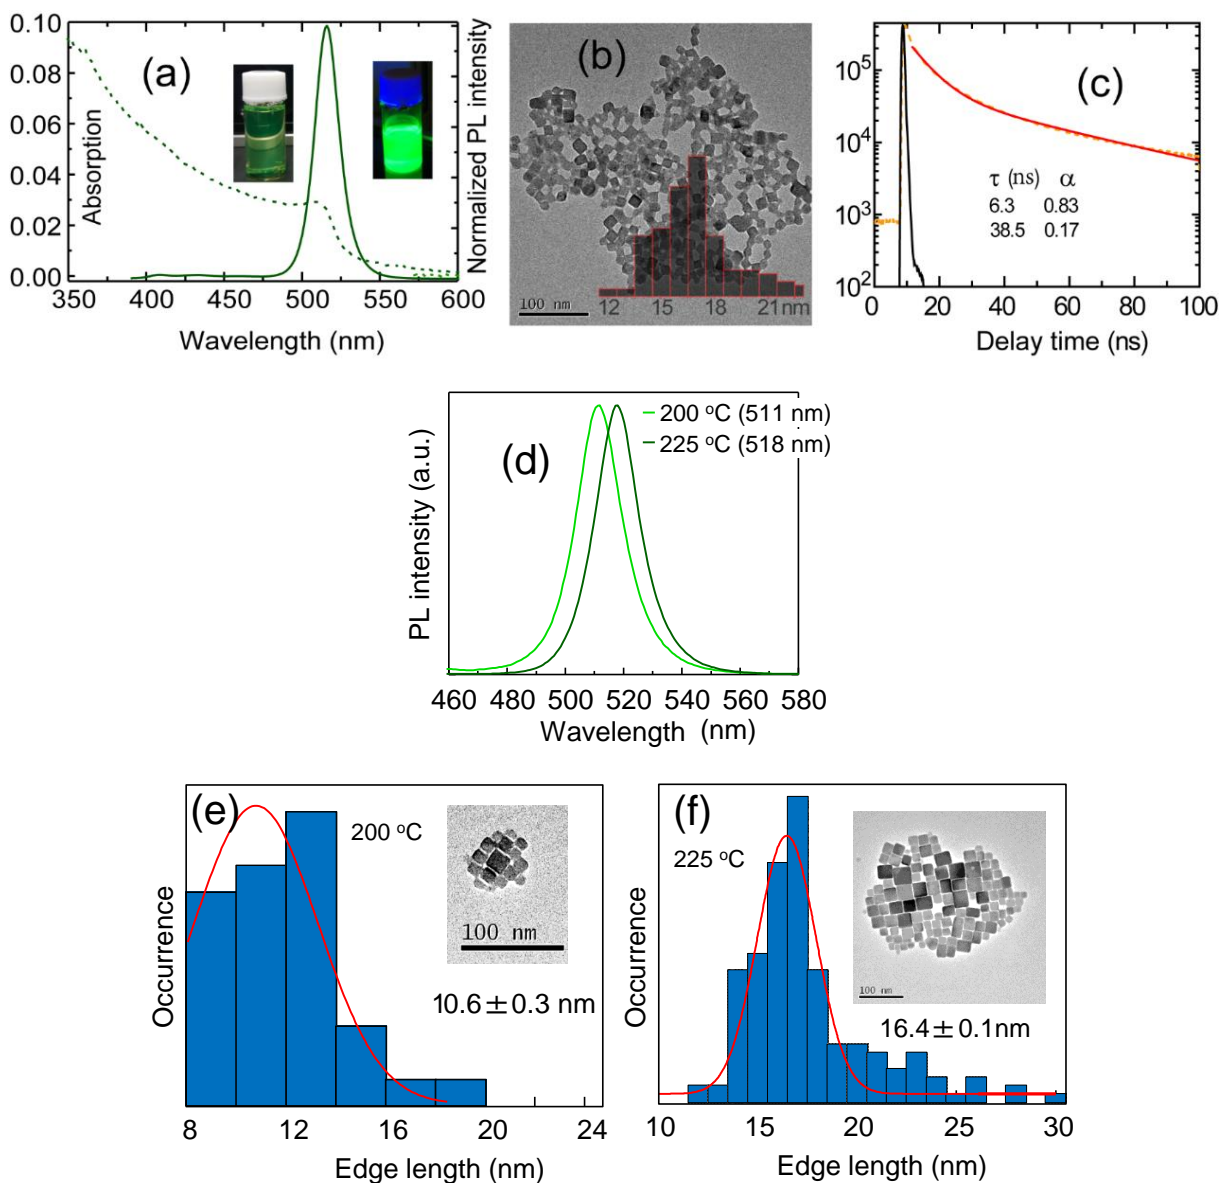

**Supplementary Figure 1.** (a) UV-visible absorption spectra (dotted line) and PL emission at 375 nm excitation. Inset shows color images of CsPbBr<sub>3</sub> without and with UV lamp radiation. (b) TEM- image and size distribution plot on top, shows cubic shape of CsPbBr<sub>3</sub> crystals of size ~ 16 nm (range 12 - 20 nm). (c) PL intensity decay curves of CsPbBr<sub>3</sub> NCs at 375 nm excitation and their corresponding double exponential fitting curves. (d) PL spectra of of CsPbBr<sub>3</sub> NCs synthesized at 200 °C and 225 °C, and their corresponding size distributions (e) and (f).

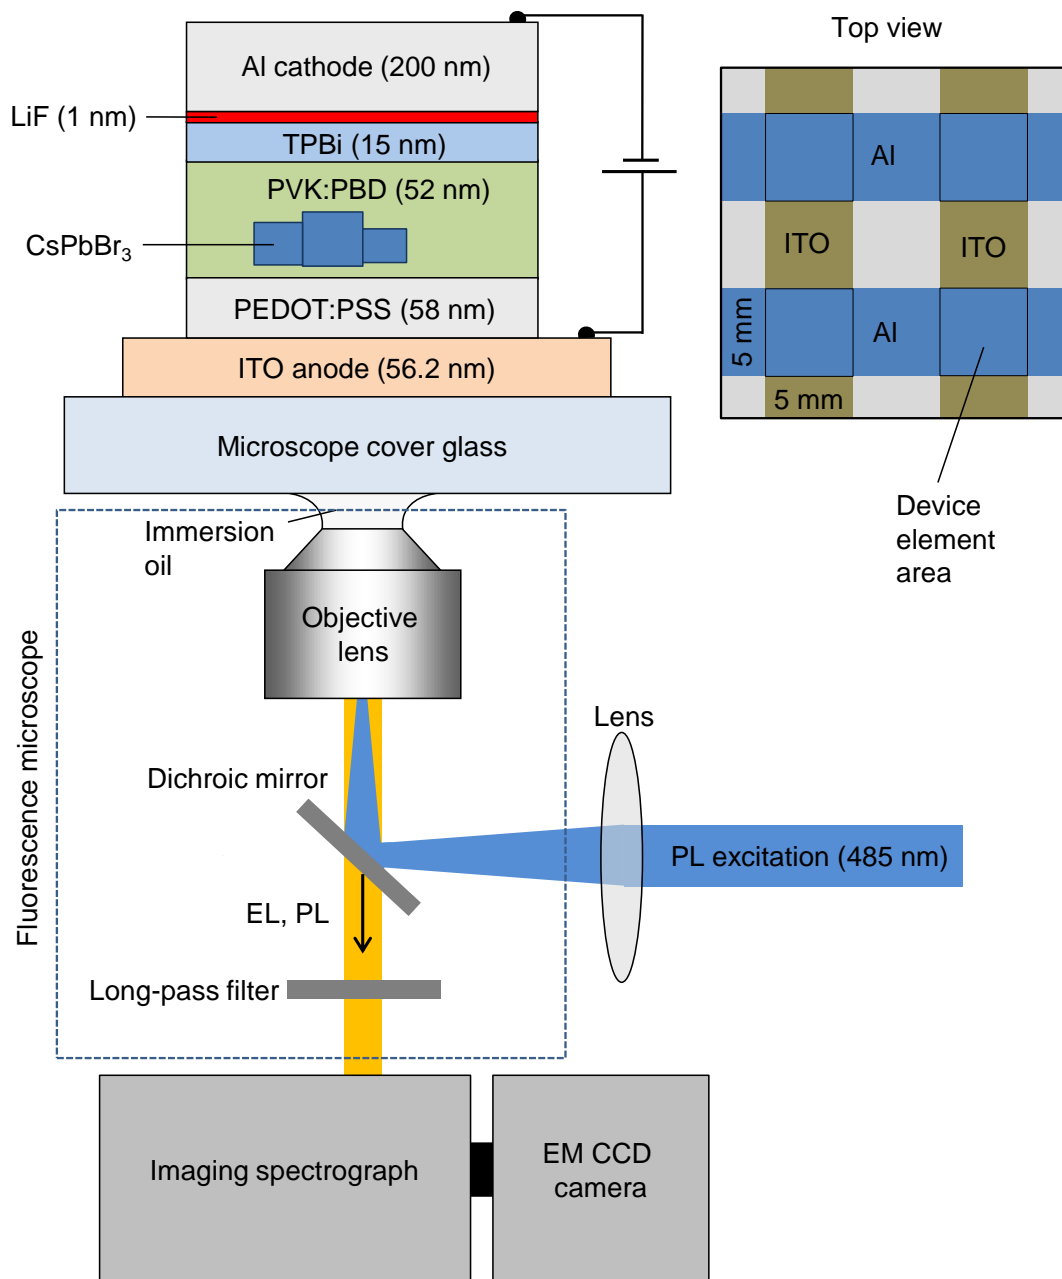

**Supplementary Figure 2.** Detailed structure of the EL device for single-particle detection, and scheme of the microscopic setup.

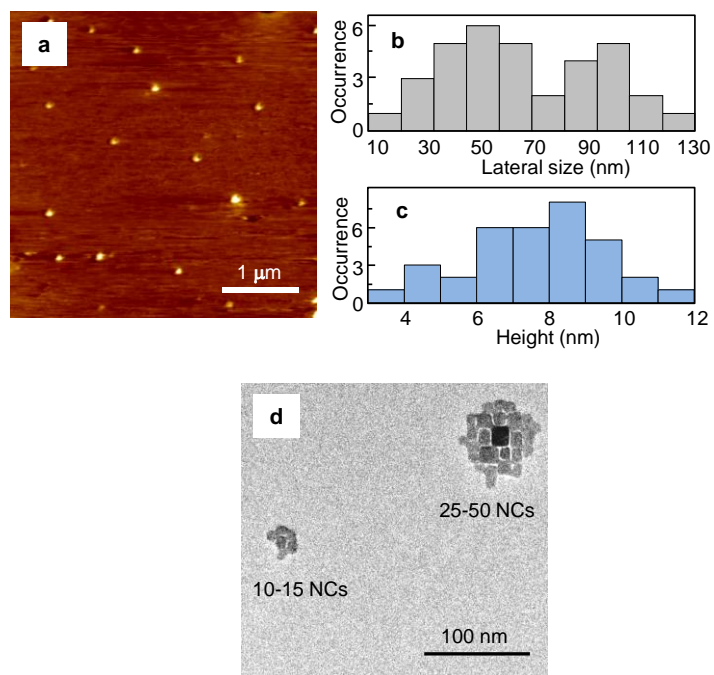

**Supplementary Figure 3.** a) Atomic force microscopic (AFM) image of aggregates of CsPbBr<sub>3</sub> NCs on mica; Distributions of lateral size (b) and height (c) analyzed from the AFM images; d) Transmission electron microscopic (TEM) image of aggregates of CsPbBr<sub>3</sub> NCs prepared under the same conditions as in a)

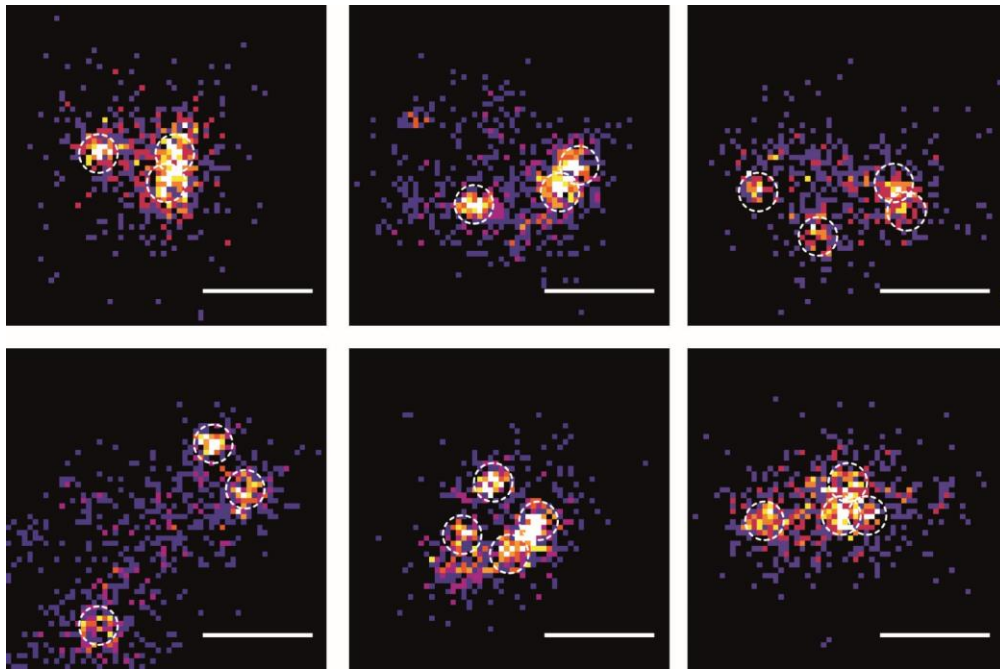

**Supplementary Figure 4.** Examples of EL super-resolution images of different aggregates at 14 V bias. The scale bar is 100 nm.

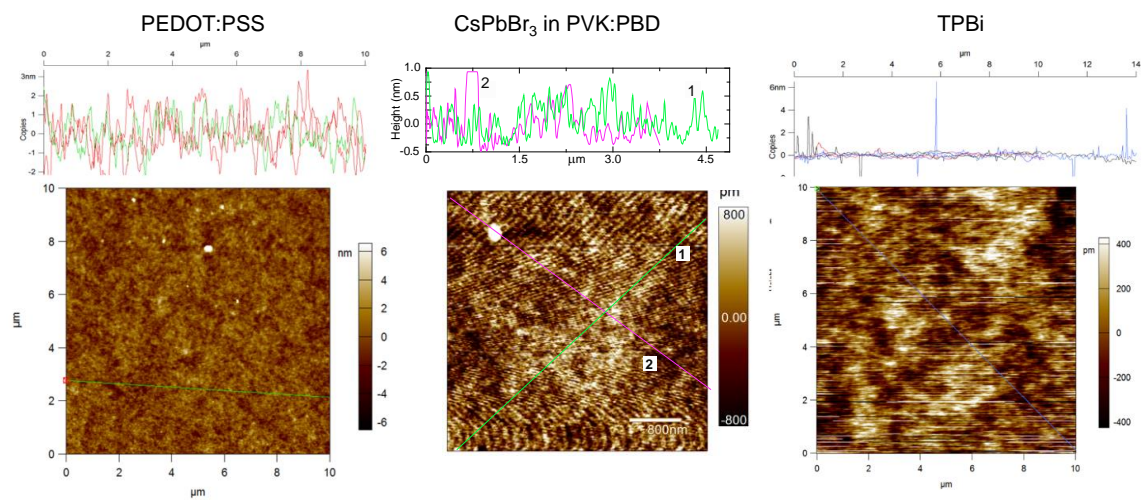

**Supplementary Figure 5.** AFM images of individual device layers obtained during the device preparation

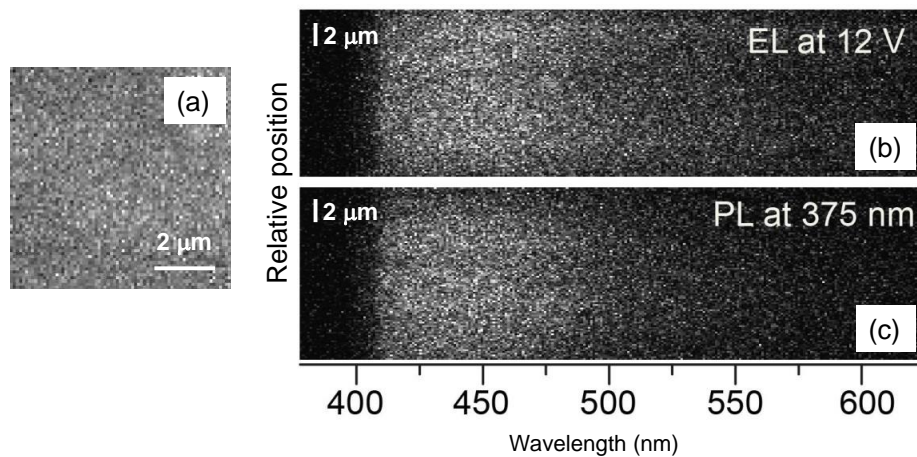

**Supplementary Figure 6.** Microscopic characterization of an OLED device with a PVK/PBD emitting layer (without doping with perovskite NCs). (a) Microscopic EL image taken at 12 V; spectrally resolved EL (b) and PL (c) image of the same area of the device, showing high degree of device homogeneity and similarity between both excitation modes.

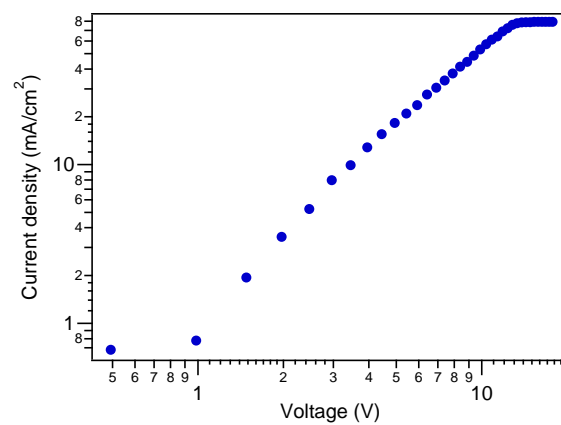

**Supplementary Figure 7.** I-V characteristics of an ITO / PEDOT:PSS / PVK:PBD / TPBi / LiF / Al device.



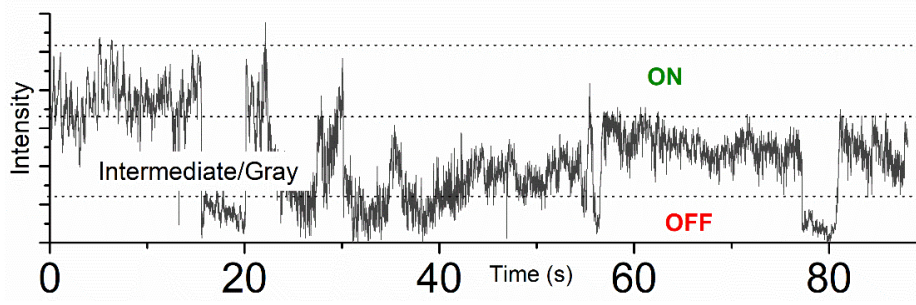

**Supplementary Figure 8.** Criteria for determining ON, Gray and OFF states for blinking analysis.

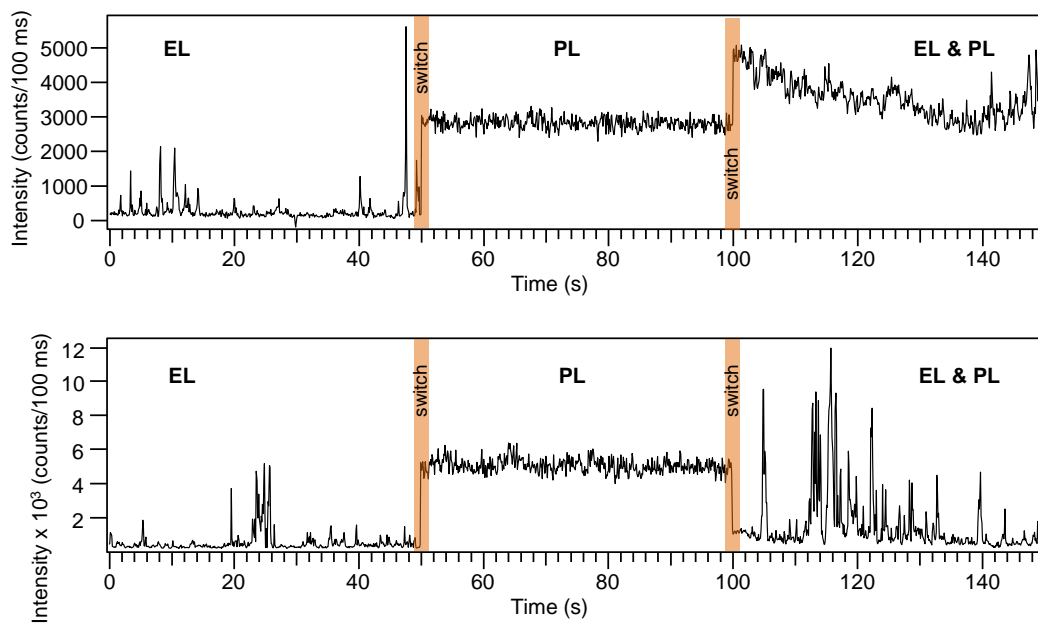

**Supplementary Figure 9.** Time-traces of emission intensity obtained from two individual aggregates during switching of the excitation modes. PL was excited at 488 nm with  $26 \text{ W}\cdot\text{cm}^{-2}$ , EL with bias of 14 V

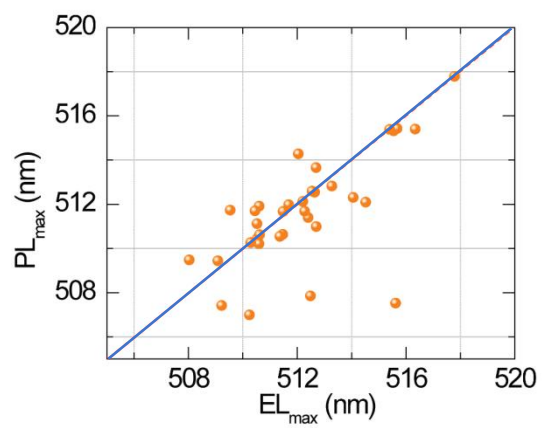

**Supplementary Figure 10.** Correlation of emission spectral maxima between PL and EL obtained on 37 NCs that were active in both excitation modes.

| <b>Layer</b>                | <b>Thickness (nm)<br/>by AFM</b>               | <b>Roughness<br/>rms (nm)</b>                  | <b>Preparation condition</b>                                                      |
|-----------------------------|------------------------------------------------|------------------------------------------------|-----------------------------------------------------------------------------------|
| ITO coated glass            | 56.2                                           | -                                              | as received                                                                       |
| PEDOT:PSS                   | $58 \pm 6$                                     | 1.162                                          | spin coated as received,<br>filtered by $0.45 \mu\text{M}$                        |
| PVK:PBD:CsPbBr <sub>3</sub> | $52 \pm 10$                                    | 0.270                                          | 1 wt % in toluene spin<br>coated in two steps at 1000<br>rpm and 4000 rpm for 30s |
| TPBi                        | $15 \pm 5$                                     | 0.510                                          | vapor deposition                                                                  |
| LiF                         | $1 \pm 0.2$ (expected,<br>optimized for 20 nm) | 2.13 nm<br>(for $\sim 11$<br>nm thick<br>film) | vapor deposition                                                                  |
| Al                          | $200 \pm 10$                                   |                                                | vapor deposition                                                                  |

**Supplementary Table 1.** Preparation and characterization of individual layers of the light-emitting device

## Supplementary Note 1

### *Spectroscopic characterization of CsPbBr<sub>3</sub> NCs in bulk solutions*

UV-vis spectra of CsPbBr<sub>3</sub> NCs in toluene with 375 nm excitation show characteristic emission at ~ 516 nm (FWHM ~ 20 nm), comparable to prior reports (Supplementary Figure 1a). The size distributions of NCs obtained from transmission electron microscopy (TEM) show approximately cube-shaped structures with edge lengths of ~ 16 ± 5 nm (Supplementary Figure 1b) indicating broader size distribution as compared to NCs reported for synthesis at ≤ 200 °C, probably due to the high temperature (225 °C) set to synthesize slightly larger high-quality CsPbBr<sub>3</sub> NCs. We noticed however, that the PL emission width for these NCs synthesized at 225 °C remains comparable (~ 20 nm) to the CsPbBr<sub>3</sub> synthesized at ~200 °C which can be attributed to the moderate quantum confined effect (with the excitonic Bohr diameter of 7 ~ 11 nm) for these NCs. Comparison of the PL spectra and size distributions of the samples synthesized at ~200 °C and at ~225 °C (shown in Supplementary Figure 1d) further confirms the moderate quantum confined effect. Supplementary Figure 1c depicting the excited state lifetime of CsPbBr<sub>3</sub> in toluene shows two-exponential relaxation attributed conventionally to trap assisted and excitonic emissions.

## Supplementary Note 2

### *Estimation of the charge recombination rate on a single CsPbBr3 nanocrystal*

To estimate the charge recombination rate, we adopted the approach used for imaging of single organic molecules in OLED devices [1]. We assume Langevin-type recombination [2] in which the recombination rate  $n_r$  is given by

$$n_r = \frac{\pi r_c^2}{e} j \quad (1)$$

where  $j$  is current density and  $r_c$  a capture radius. The capture radius  $r_c$  represents a critical distance at which the Coulomb binding energy between an electron and a hole equals the thermal energy  $kT$ . The  $r_c$  is given by

$$r_c = \frac{e^2}{4\pi\epsilon kT} \quad (2)$$

For PVK, the  $r_c$  can be estimated as 23 nm. Adding half the NC edge length as a physical dimension of the NC gives an effective  $r_c$  value of 31 nm. To determine the current density, we prepared a matrix-only device with the same structure as the one used for the single-particle EL experiments but without the perovskite NCs doped. The current density was determined from an I-V dependence (Supplementary Figure 7) measured on this device. At 14 V,  $j = 0.08 \text{ A.cm}^{-2}$  which gives the recombination rate  $n_r$  of  $1.2 \times 10^7 \text{ s}^{-1}$ . The actual recombination rate will be influenced by many factors and its correct estimation is more complex, and as such the value of  $n_r$  obtained above should be treated as an upper limit of the true rate.

### Supplementary References:

1. Nothaft, M.; Hoehla, S.; Nicolet, A.; Jelezko, F.; Fruehauf, N.; Pflaum, J.; Wrachtrup, J. Optical Sensing of Current Dynamics in Organic Light-Emitting Devices at the Nanometer Scale. *ChemPhysChem* 12, 2590-2595 (2011)
2. Blom, P. W. M.; de Jong, M. J. M.; Breedijk, S. Temperature dependent electron-hole recombination in polymer light-emitting diodes. *Appl. Phys. Lett.* 71, 930-932 (1997)
